# Supplementary material
Source: Springer Nature journal article supplement (https://www.springermedizin.de/resource/supplementary/12913_2010_1619_MOESM2_ESM.pdf/9528618)

## Health systems strengthening – Public sector engagement with not-for-profit NGOs

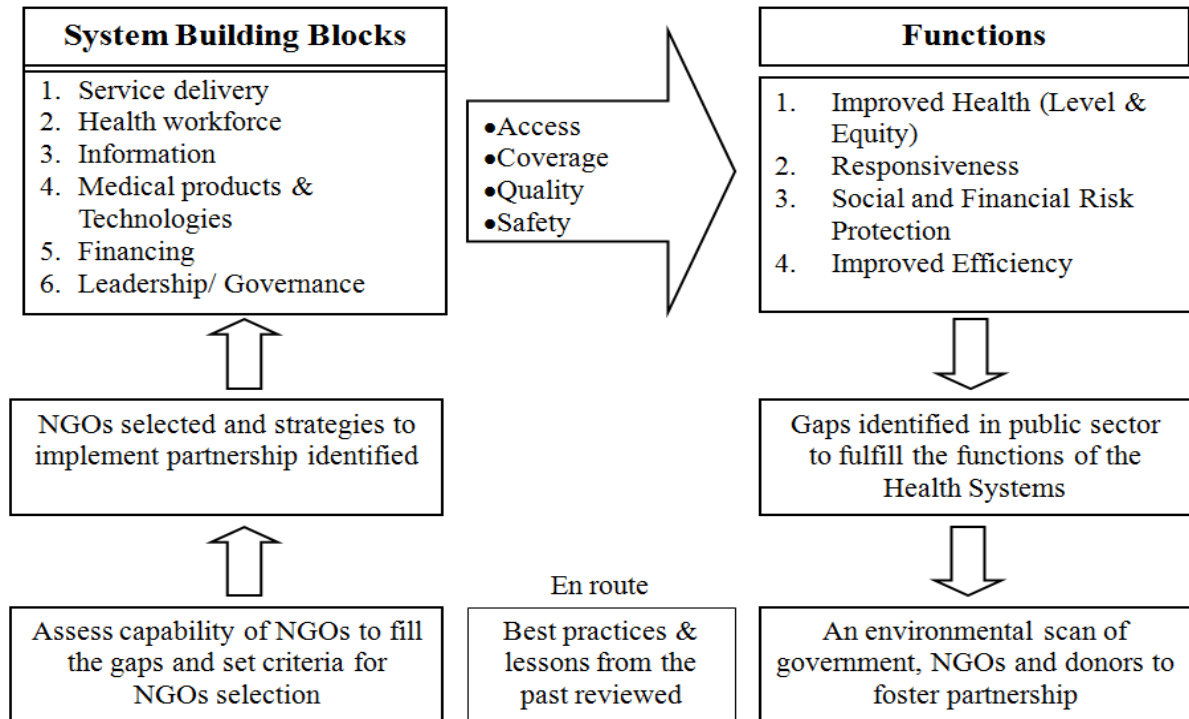

Supplement: MOESM2 [file 9528618]
